# Supplementary material for: Modeling the Competition between Misfolded Aβ Conformers That Produce Distinct Types of Amyloid Pathology in Alzheimer’s Disease
Source: MDPI journal article supplement (doi:10.3390/biom12070886), 2022-06-24
Supplement: s1 [file s1]

## Supplementary Materials

### Modeling the competition between misfolded A $\beta$ conformers that produce distinct types of amyloid pathology in Alzheimer's disease

Guilian Xu<sup>1-3</sup>, Susan Fromholt<sup>1-3</sup>, David R. Borchelt<sup>1-3</sup>

<sup>1</sup>Department of Neuroscience, College of Medicine, University of Florida, Gainesville, FL 32610, USA.

<sup>2</sup>Center for Translational Research in Neurodegenerative Disease, College of Medicine, University of Florida, Gainesville, FL 32610, USA.

<sup>3</sup>McKnight Brain Institute, College of Medicine, University of Florida, Gainesville, FL 32610, USA.

**Table S1.** Data for individual animals from PrP.MoA $\beta$ /PS1 mice injected with seeding homogenates.

| First Passage in PrP.MoA $\beta$ /PS1(Cr) mice |     |                           |               |                |       |
|------------------------------------------------|-----|---------------------------|---------------|----------------|-------|
| Animal ID#                                     | Sex | Seed Source               | Age Harvested | Pathology Type | Score |
| 0266885-2                                      | M   | None                      | 9             | None           | -     |
| 0334921-1                                      | M   | None                      | 10            | None           | -     |
| 0334921-2                                      | M   | None                      | 10            | None           | -     |
| 0336477-3                                      | F   | None                      | 10            | None           | -     |
| 0656952-1                                      | M   | None                      | 12            | None           | -     |
| 0850873-1                                      | M   | PrP.APPsi (Df)            | 12            | Df             | ++    |
| 0850872-1                                      | F   | PrP.APPsi (Df)            | 12            | Df             | +++   |
| 0884222-1                                      | M   | PrP.APPsi (Df)            | 12            | Df             | ++    |
| 0711779-4                                      | F   | Tet.MoA $\beta$ (Df)      | 9             | Df             | ++    |
| 0711783-2                                      | M   | Tet.MoA $\beta$ (Df)      | 12            | Df             | +++   |
| 0973439-3                                      | F   | Tet.MoA $\beta$ (Df)      | 10            | Df             | +++   |
| 0973441-1                                      | M   | Tet.MoA $\beta$ (Df)      | 10            | Df             | +++   |
| 0793910-1                                      | M   | PrP.HuA $\beta$ /PS1 (Cr) | 12            | M              | +     |
| 0874270-1                                      | M   | PrP.HuA $\beta$ /PS1 (Cr) | 10            | Cr             | +     |
| 0879086-1                                      | M   | PrP.HuA $\beta$ /PS1 (Cr) | 12            | Cr             | +     |
| 0879086-2                                      | M   | PrP.HuA $\beta$ /PS1 (Cr) | 12            | Cr             | +     |
| 0879087-2                                      | F   | PrP.HuA $\beta$ /PS1 (Cr) | 12            | Cr             | +     |
| 0720151-2                                      | F   | PrP.MoA $\beta$ /PS1 (Cr) | 12            | Cr             | +     |
| 0706695-3                                      | M   | PrP.MoA $\beta$ /PS1 (Cr) | 9             | Cr             | +     |
| 0864798-1                                      | M   | PrP.MoA $\beta$ /PS1 (Cr) | 12            | Cr             | +     |
| 1025434-1                                      | M   | PrP.MoA $\beta$ /PS1 (Cr) | 12            | Cr             | -     |
| 1025434-2                                      | M   | PrP.MoA $\beta$ /PS1 (Cr) | 12            | Cr             | +     |
| 1025434-3                                      | M   | PrP.MoA $\beta$ /PS1 (Cr) | 12            | Cr             | +     |

**Table S1** (continued). Data for individual animals from PrP.HuA $\beta$ /PS1 mice injected with seeding homogenates.

| First Passage in PrP.HuA $\beta$ /PS1(Cr) mice |     |                           |               |                |       |
|------------------------------------------------|-----|---------------------------|---------------|----------------|-------|
| Animal ID#                                     | Sex | Seed Source               | Age Harvested | Pathology Type | Score |
| 1004005-1                                      | F   | None                      | 5             | Cr             | +     |
| 1004005-2                                      | F   | None                      | 5             | Cr             | +     |
| 0574005-2                                      | M   | None                      | 6             | Cr             | +     |
| 0862093-3                                      | M   | PrP.APPsi (Df)            | 6             | Cr             | +     |
| 0862093-4                                      | M   | PrP.APPsi (Df)            | 6             | Cr             | ++    |
| 0862082-1                                      | M   | PrP.APPsi (Df)            | 6             | Cr             | +     |
| 0862087-1                                      | F   | PrP.APPsi (Df)            | 6             | Cr             | ++    |
| 0871377-1                                      | M   | Tet.MoA $\beta$ (Df)      | 6             | M              | +     |
| 0871377-4                                      | M   | Tet.MoA $\beta$ (Df)      | 6             | M              | ++    |
| 0871376-1                                      | F   | Tet.MoA $\beta$ (Df)      | 6             | M              | ++    |
| 0879926-3                                      | M   | Tet.MoA $\beta$ (Df)      | 6             | M              | ++    |
| 0879926-4                                      | M   | Tet.MoA $\beta$ (Df)      | 6             | M              | ++    |
| 0793904-1                                      | M   | PrP.HuA $\beta$ /PS1 (Cr) | 6             | Cr             | +     |
| 0793904-2                                      | M   | PrP.HuA $\beta$ /PS1 (Cr) | 6             | Cr             | +     |
| 0793904-4                                      | M   | PrP.HuA $\beta$ /PS1 (Cr) | 6             | Cr             | +     |
| 0808994-1                                      | M   | PrP.HuA $\beta$ /PS1 (Cr) | 6             | Cr             | +     |
| 0808994-3                                      | M   | PrP.HuA $\beta$ /PS1 (Cr) | 6             | Cr             | +     |
| 0808994-4                                      | M   | PrP.HuA $\beta$ /PS1 (Cr) | 6             | Cr             | ++    |
| 0808993-3                                      | F   | PrP.HuA $\beta$ /PS1 (Cr) | 6             | Cr             | +     |
| 0808996-1                                      | M   | PrP.HuA $\beta$ /PS1 (Cr) | 6             | Cr             | +     |
| 0808996-2                                      | M   | PrP.HuA $\beta$ /PS1 (Cr) | 6             | Cr             | +     |
| 0879931-1                                      | M   | PrP.MoA $\beta$ /PS1 (Cr) | 6             | Cr             | +     |
| 0879931-2                                      | M   | PrP.MoA $\beta$ /PS1 (Cr) | 6             | Cr             | +     |
| 0879931-4                                      | M   | PrP.MoA $\beta$ /PS1 (Cr) | 6             | Cr             | +     |
| 0879931-5                                      | M   | PrP.MoA $\beta$ /PS1 (Cr) | 6             | Cr             | +     |
| 0879930-1                                      | F   | PrP.MoA $\beta$ /PS1 (Cr) | 6             | Cr             | +     |
| 0896402-1                                      | M   | PrP.MoA $\beta$ /PS1 (Cr) | 6             | Cr             | +     |
| 0896402-2                                      | M   | PrP.MoA $\beta$ /PS1 (Cr) | 6             | Cr             | +     |

**Table S2.** Data for individual animals from serial passaging experiments.

| Animal ID # | Sex | Passage History<br>(host strain)                                                          | Age<br>Harvested | Last Recipient Pathology<br>Type at Harvest | Pathology<br>Burden Score |
|-------------|-----|-------------------------------------------------------------------------------------------|------------------|---------------------------------------------|---------------------------|
| 0898272-1   | F   | Tet.MoA $\beta$ to<br>PrP.APPsi to<br>PrPHuA $\beta$ /PS1<br>(Df to Df to Cr)             | 6                | M                                           | ++                        |
| 0898279-2   | M   |                                                                                           | 6                | M                                           | ++                        |
| 0898279-4   | M   |                                                                                           | 6                | M                                           | ++                        |
| 0898276-1   | F   |                                                                                           | 6                | M                                           | ++                        |
| 0905961-3   | F   |                                                                                           | 6                | M                                           | ++                        |
| 0905960-2   | F   |                                                                                           | 6                | M                                           | ++                        |
| 0898273_1   | F   | Tet.MoA $\beta$ to<br>PrP.APPsi to<br>PrP.APPsi<br>(Df to Df to Df)                       | 12               | Df                                          | +++                       |
| 0898274_1   | M   |                                                                                           | 12               | Df                                          | +++                       |
| 0951046_1   | F   |                                                                                           | 12               | Df                                          | +++                       |
| 1052846-1   | M   | Tet.MoA $\beta$ to<br>PrP.APPsi to<br>PrP.MoA $\beta$ /PS1<br>(Df to Df to Cr)            | 12               | Df                                          | +++                       |
| 1052845-1   | F   |                                                                                           | 12               | Df                                          | +++                       |
| 1052847-1   | F   |                                                                                           | 12               | Df                                          | +++                       |
| 1052848-1   | M   |                                                                                           | 12               | Df                                          | +++                       |
| 1049839-4   | M   |                                                                                           | 12               | Df                                          | +++                       |
| 0896400-1   | M   | Tet.MoA $\beta$ to<br>PrP.MoA $\beta$ /PS1 to<br>PrP.HuA $\beta$ /PS1<br>(Df to Cr to Cr) | 6                | M                                           | ++                        |
| 0896400-3   | M   |                                                                                           | 6                | M                                           | ++                        |
| 0896401-2   | F   |                                                                                           | 6                | M                                           | +                         |
| 0896401-3   | F   |                                                                                           | 6                | M                                           | ++                        |
| 0904807-3   | F   |                                                                                           | 6                | M                                           | ++                        |
| 0970245_1   | F   | Tet.MoA $\beta$ to<br>PrP.MoA $\beta$ /PS1 to<br>APPsi<br>(Df to Cr to Df)                | 11               | Df                                          | +++                       |
| 0970245_2   | F   |                                                                                           | 11               | Df                                          | +++                       |
| 0970245_3   | F   |                                                                                           | 11               | Df                                          | +++                       |
| 0979027_1   | M   |                                                                                           | 11               | Df                                          | +++                       |
| 0979027_2   | M   |                                                                                           | 11               | Df                                          | +++                       |
| 0970245_1   | F   |                                                                                           | 11               | Df                                          | +++                       |
| 0953016-1   | F   | Tet.MoA $\beta$ to<br>PrP.MoA $\beta$ /PS1 to<br>PrP.MoA $\beta$ /PS1<br>(Df to Cr to Cr) | 12               | Df                                          | +++                       |
| 0953016-2   | F   |                                                                                           | 12               | Df                                          | +++                       |
| 0950580-1   | F   |                                                                                           | 12               | Df                                          | +++                       |
| 0904803-3   | M   | PrP.HuA $\beta$ /PS1 to<br>PrP.APPsi to<br>PrP.HuA $\beta$ /PS1<br>(Cr to Df to Cr)       | 6                | Cr                                          | +                         |
| 0904806-3   | F   |                                                                                           | 6                | Cr                                          | +                         |
| 1015397-1   | M   |                                                                                           | 5                | Cr                                          | ++                        |
| 1015397-2   | M   |                                                                                           | 5                | Cr                                          | +                         |
| 1015397-3   | M   |                                                                                           | 5                | Cr                                          | +                         |
| 1015396-1   | F   |                                                                                           | 5                | Cr                                          | +                         |
| 0914085_1   | M   | PrP.HuA $\beta$ /PS1 to<br>PrP.APPsi to<br>PrP.APPsi<br>(Cr to Df to Df)                  | 12               | Df                                          | +++                       |
| 0914085_2   | M   |                                                                                           | 12               | Df                                          | +++                       |
| 0914085_3   | M   |                                                                                           | 12               | Df                                          | +++                       |
| 0914086_1   | F   |                                                                                           | 12               | Df                                          | +++                       |
| 0914086_2   | F   |                                                                                           | 12               | Df                                          | ++                        |
| 0922186-2   | M   | PrP.MoA $\beta$ /PS1 to<br>PrP.APPsi to<br>PrP.HuA $\beta$ /PS1<br>(Cr to Df to Cr)       | 6                | Cr                                          | +                         |
| 0922185-1   | F   |                                                                                           | 6                | Cr                                          | ++                        |
| 0904809-3   | M   |                                                                                           | 6                | M                                           | +                         |
| 0904809-4   | M   |                                                                                           | 6                | M                                           | +                         |
| 0904808-2   | F   |                                                                                           | 6                | Cr                                          | +                         |
| 0904808-3   | F   |                                                                                           | 6                | Cr                                          | +                         |
| 0901683_1   | F   | PrP.MoA $\beta$ /PS1 to<br>PrP.APPsi to<br>PrP.APPsi<br>(Cr to Df to Df)                  | 12               | Df                                          | +++                       |
| 0901683_2   | F   |                                                                                           | 12               | Df                                          | +++                       |
| 0957340_1   | F   |                                                                                           | 12               | Df                                          | +++                       |

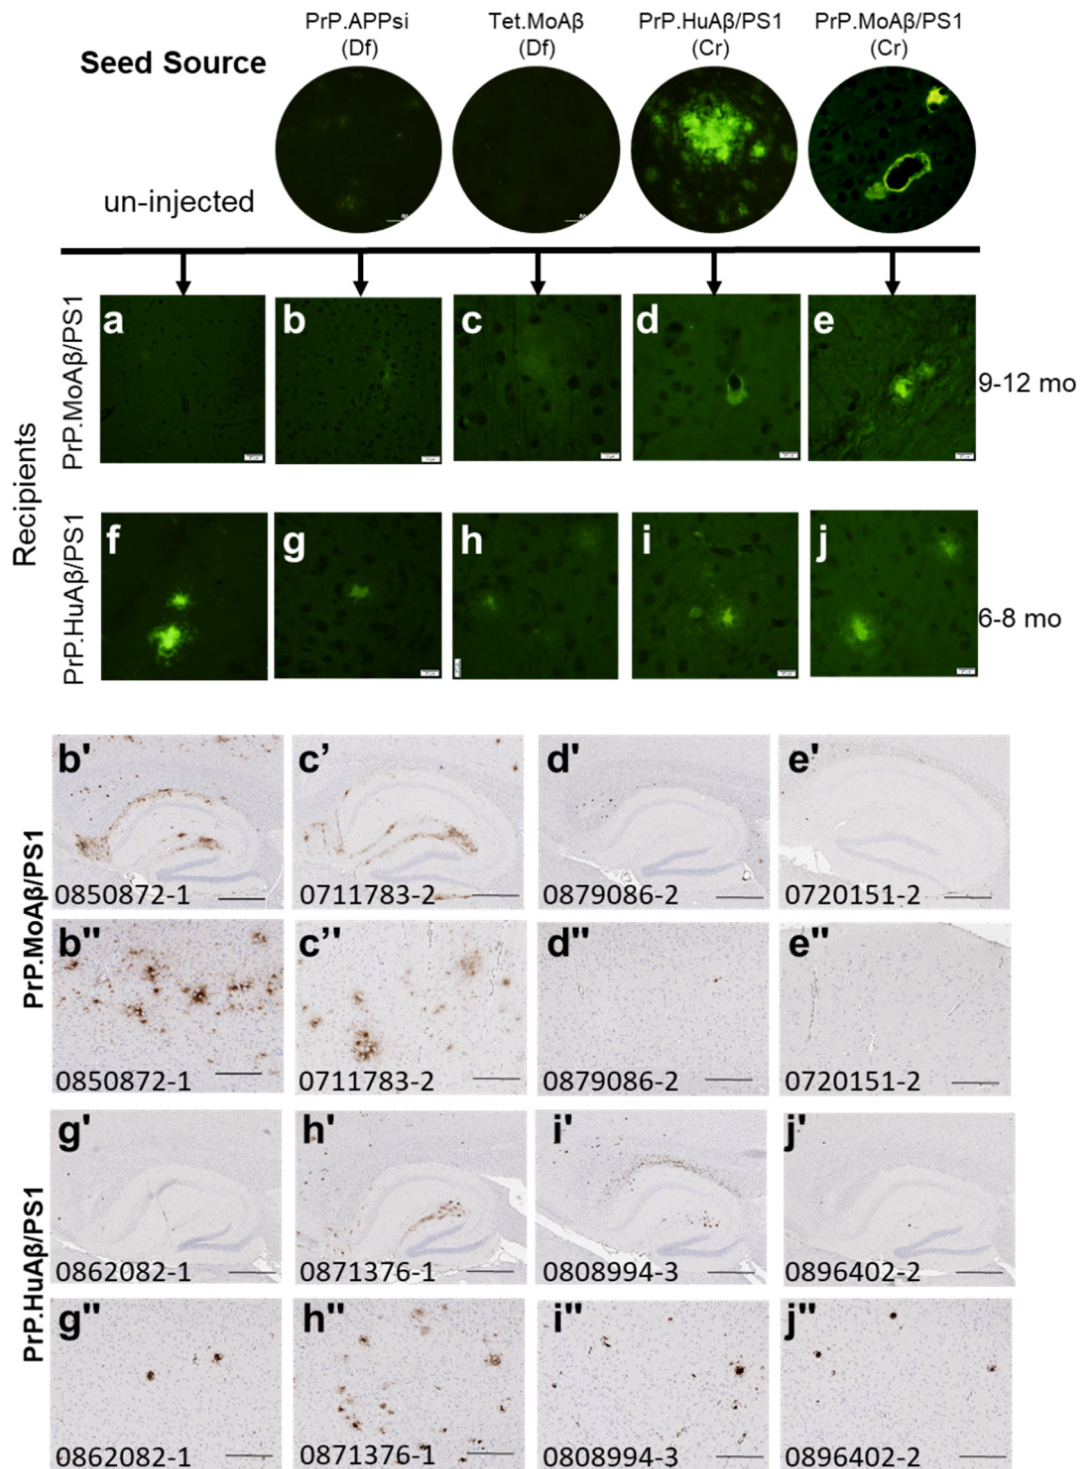

**Figure S1.** Representative images from tissue sections stained with Thio-S and A $\beta$  antibodies for animals displayed in Figure 1. The layout of the figure is identical to that of Fig. 1 in the main text. The upper panels show high power images of A $\beta$  deposit morphology from Thio-S silver staining in the brain of the seed source animal. The square images are from uninjected mice (a) and the brains of the recipients (b-j). All of these images are from cortex. b'-j'') Representative images of hippocampus and cortex of recipient mice. The labels and scale bars are the same as described in the legend of Figure 1 of the main text.



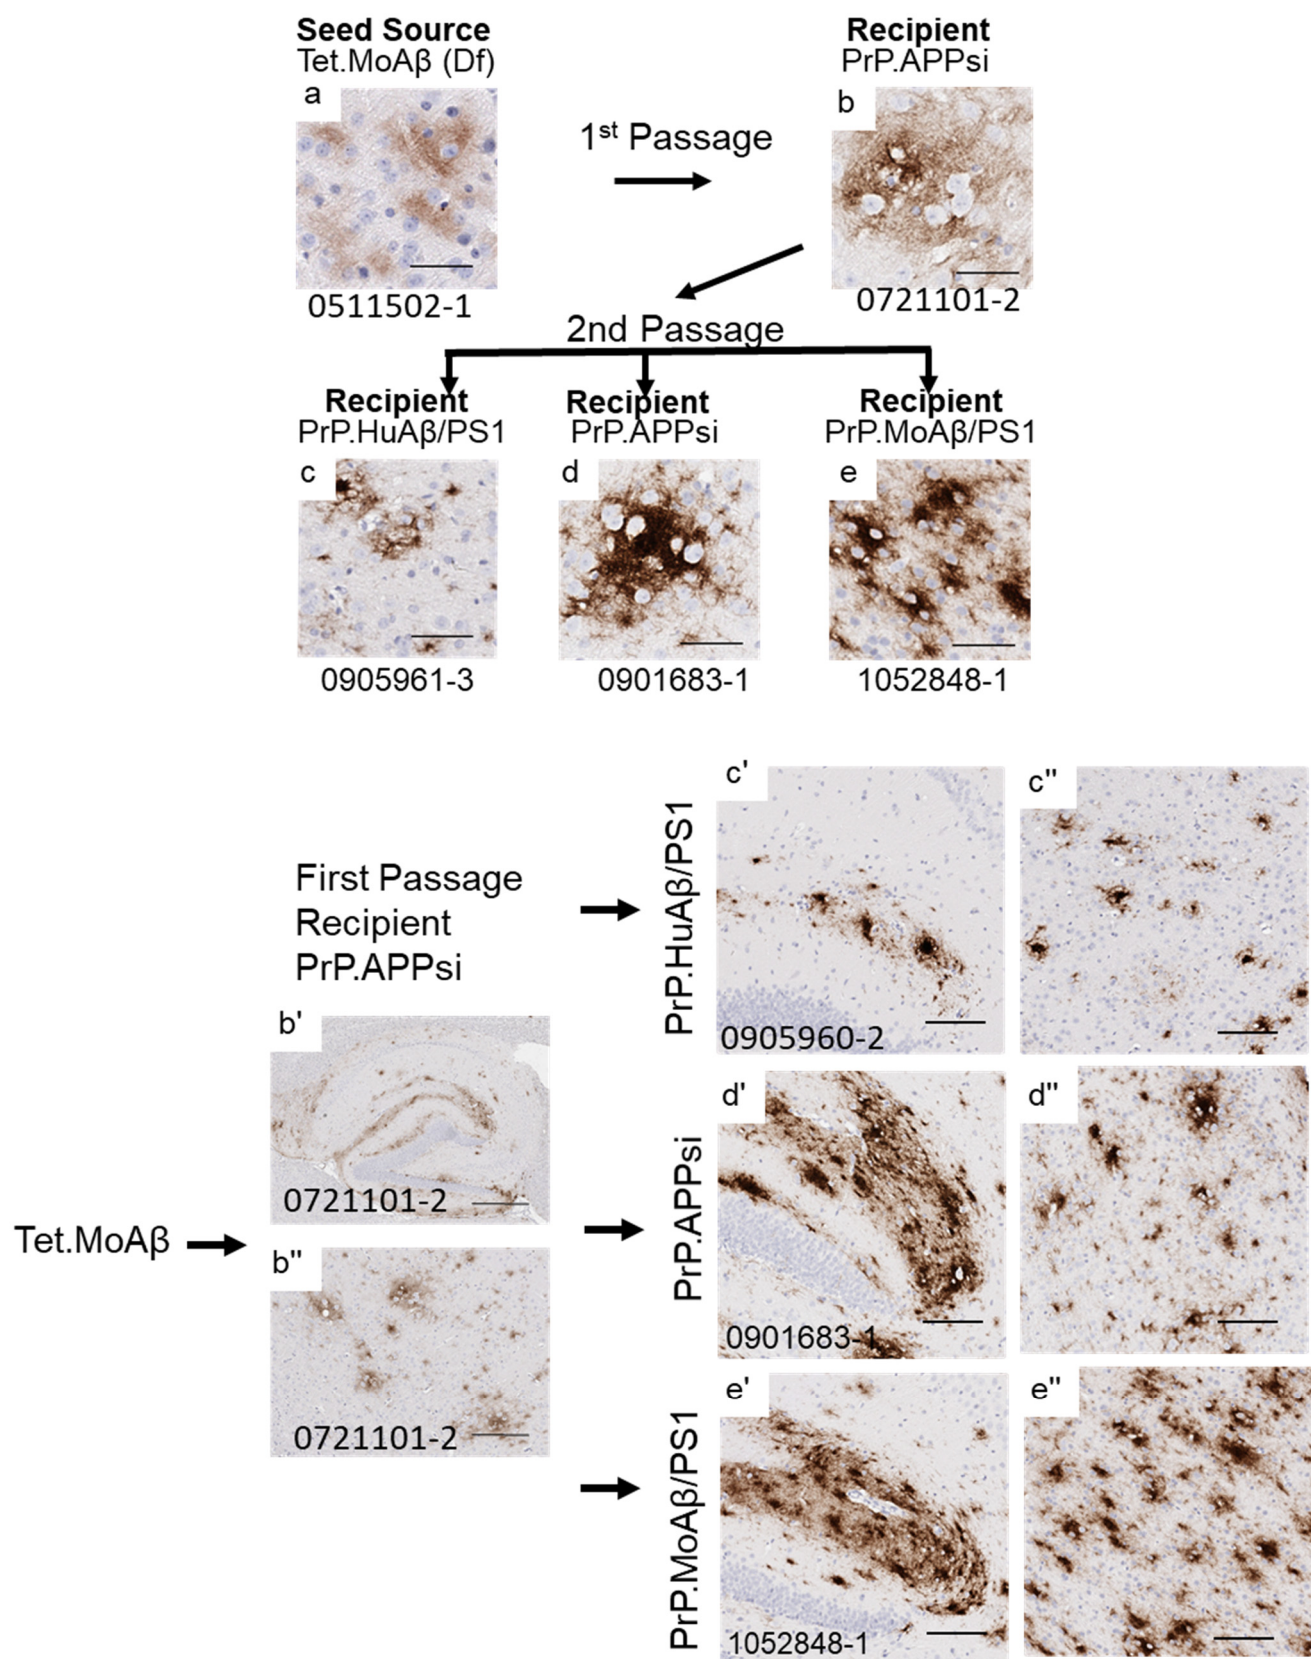

**Figure S2.** Representative images from tissue sections stained with Aβ antibodies for animals displayed in Figure 2. The layout of the figure, including labels and scale bars, is identical to the description of in the legend of Fig. 2 in the main text.

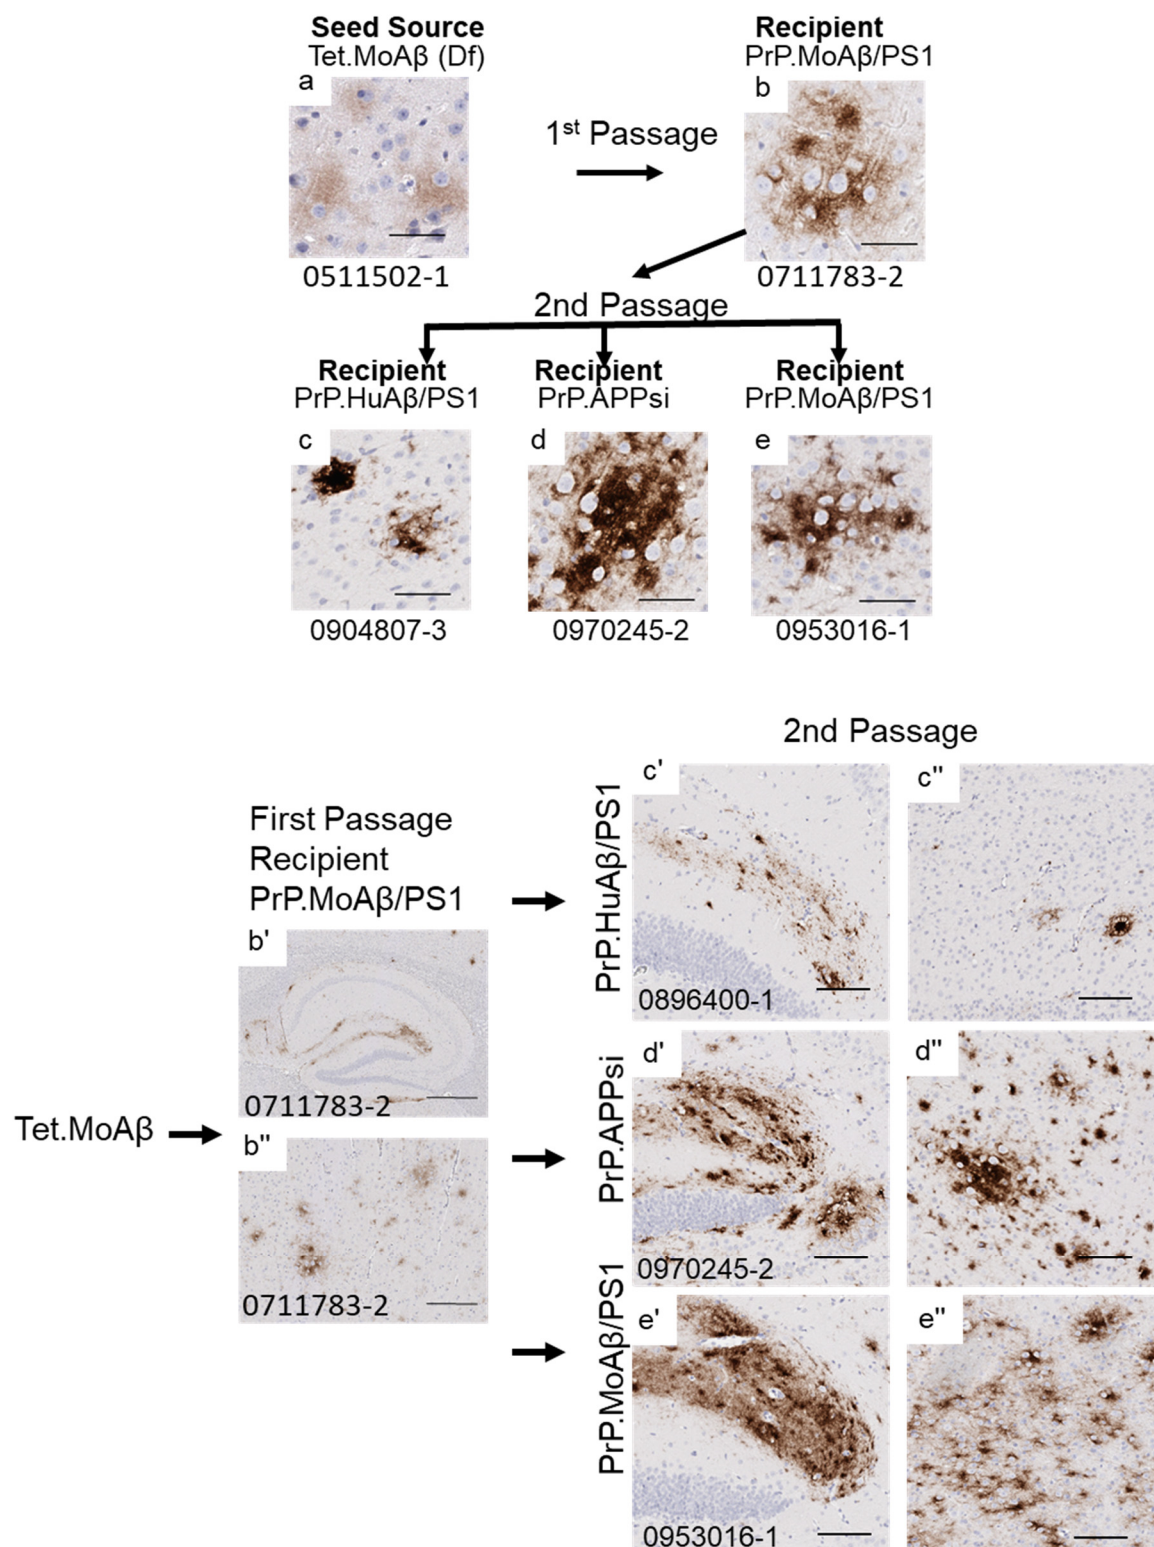

**Figure S3.** Representative images from tissue sections stained with A $\beta$  antibodies for animals displayed in Figure 3. The layout of the figure, including labels and scale bars, is identical to the description of in the legend of Fig. 3 in the main text.



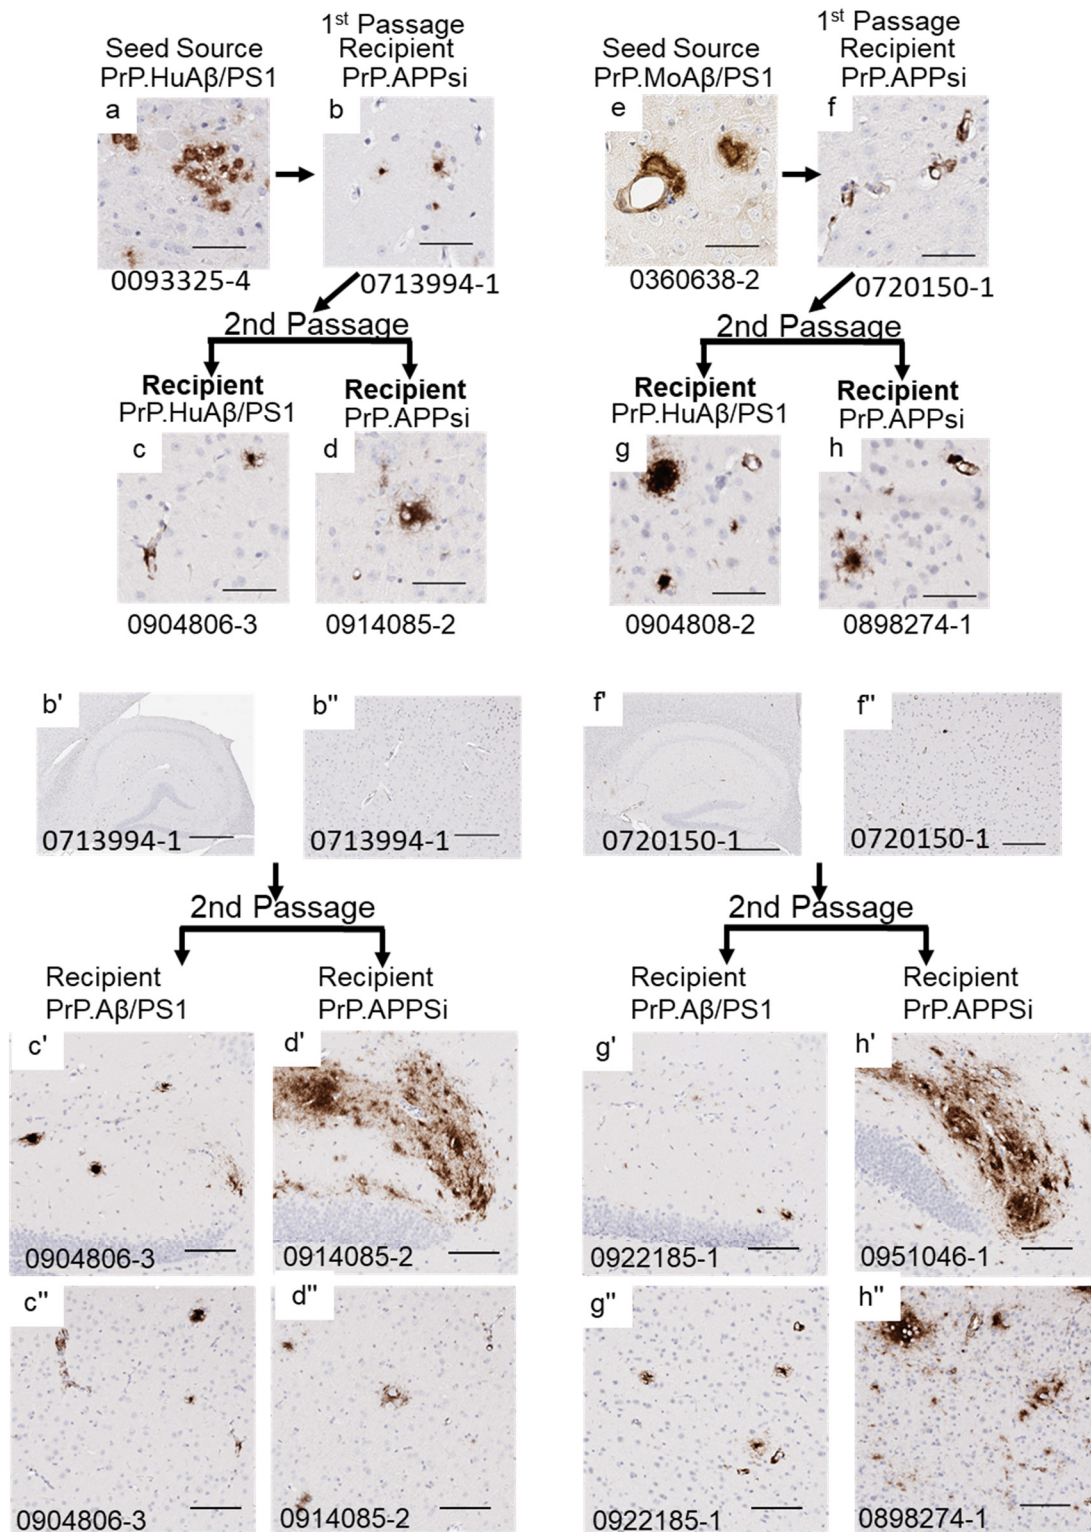

**Figure S4.** Representative images from tissue sections stained with Aβ antibodies for animals displayed in Figure 4. The layout of the figure, including labels and scale bars, is identical to the description of in the legend of Fig. 4 in the main text.
